# Supplementary material for: One step preparation of ‘ready to use’ Au@Pd nanoparticle modified surface using deep eutectic solvents and a study of its electrocatalytic properties in methanol oxidation reaction
Source: Royal Society of Chemistry journal article supplement (doi:10.1039/c4ta05302h), 2014-12-08
Supplement: c4ta05302h1.pdf [file c4ta05302h1.pdf]

## One step preparation of 'ready to use' Au@Pd nanoparticle modified surface using Deep eutectic solvents and a study of its electrocatalytic properties in methanol oxidation reaction.

Anu Renjith, Lakshminarayanan V.\*

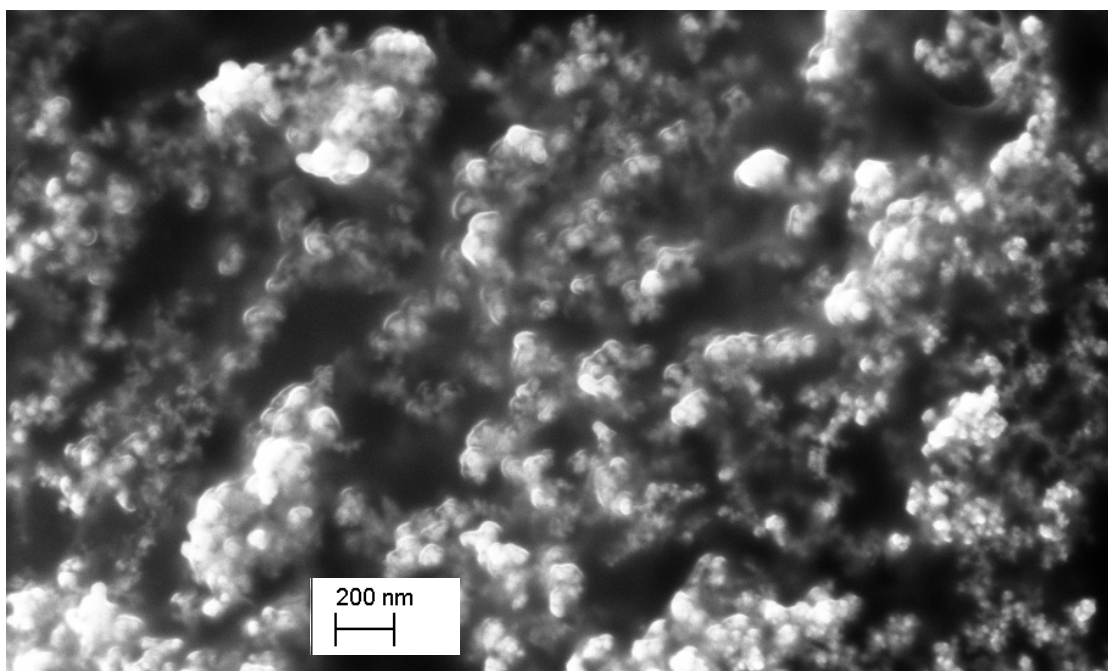

Fig.S1: SEM images of graphite rod modified with Au@Pd NPs

**Table S1:** Elemental composition of as prepared Au@Pd nanoparticles

| Element | Weight% |
|---------|---------|
| C K     | 29      |
| N K     | 12.59   |
| O K     | 3.48    |
| Cl K    | 7.33    |
| Pd L    | 47.60   |
| Totals  | 100.00  |

**Table S2:** Elemental composition of electrochemically pretreated Au@Pd nanoparticles

| Element | Weight% |
|---------|---------|
| C K     | 60.81   |
| O K     | 0.43    |
| Cl K    | 1.18    |
| Pd L    | 34.94   |
| Au M    | 2.64    |

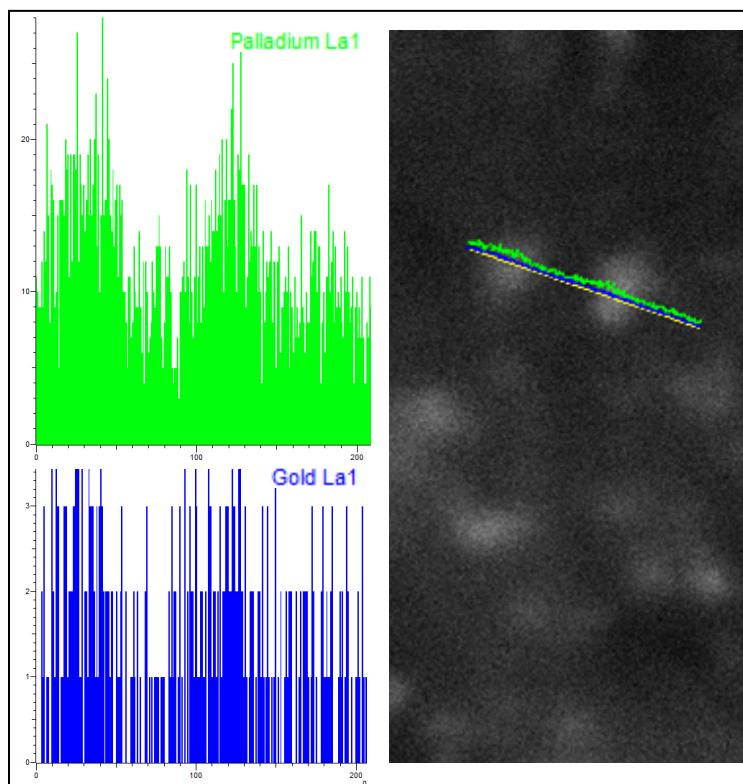

Fig.S2: EDAX line scan of electrochemically treated Au@Pd NPs on graphite

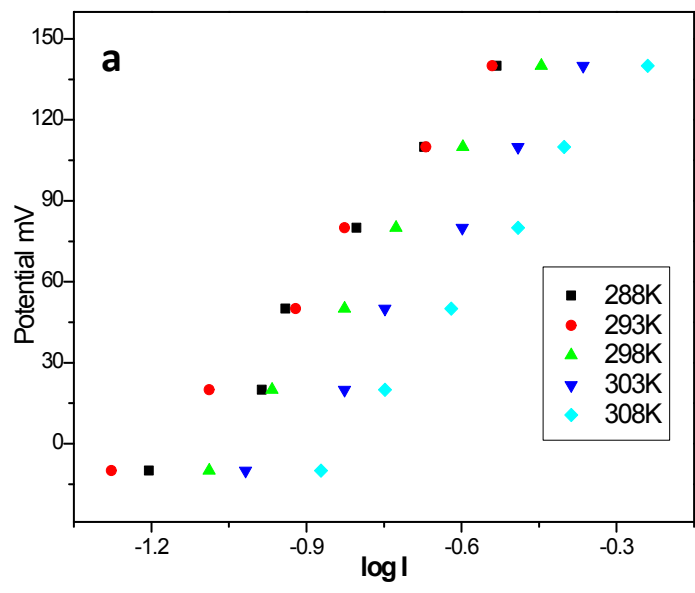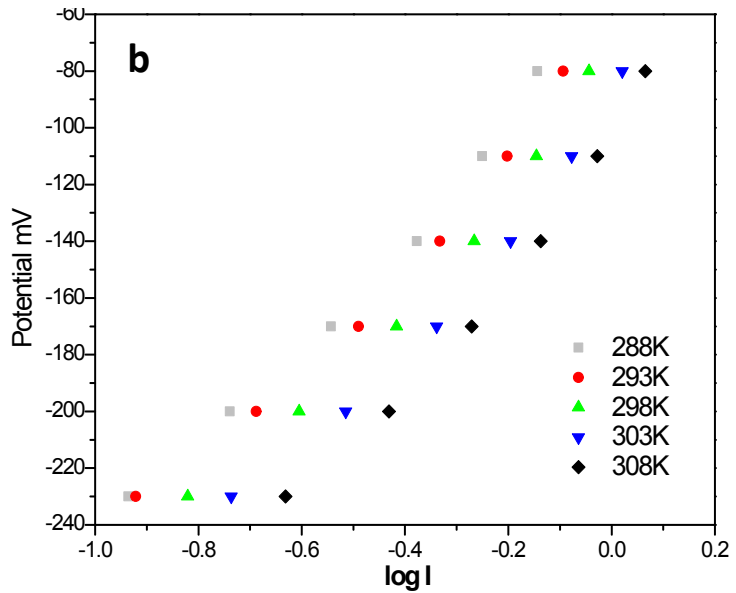

Fig.S3:Tafel plots of (a) Au NP (b)PdNP modified graphite rod in 2M MeOH / 0.5M NaOHVs Hg/HgO/1M NaOH at different temperature ranges

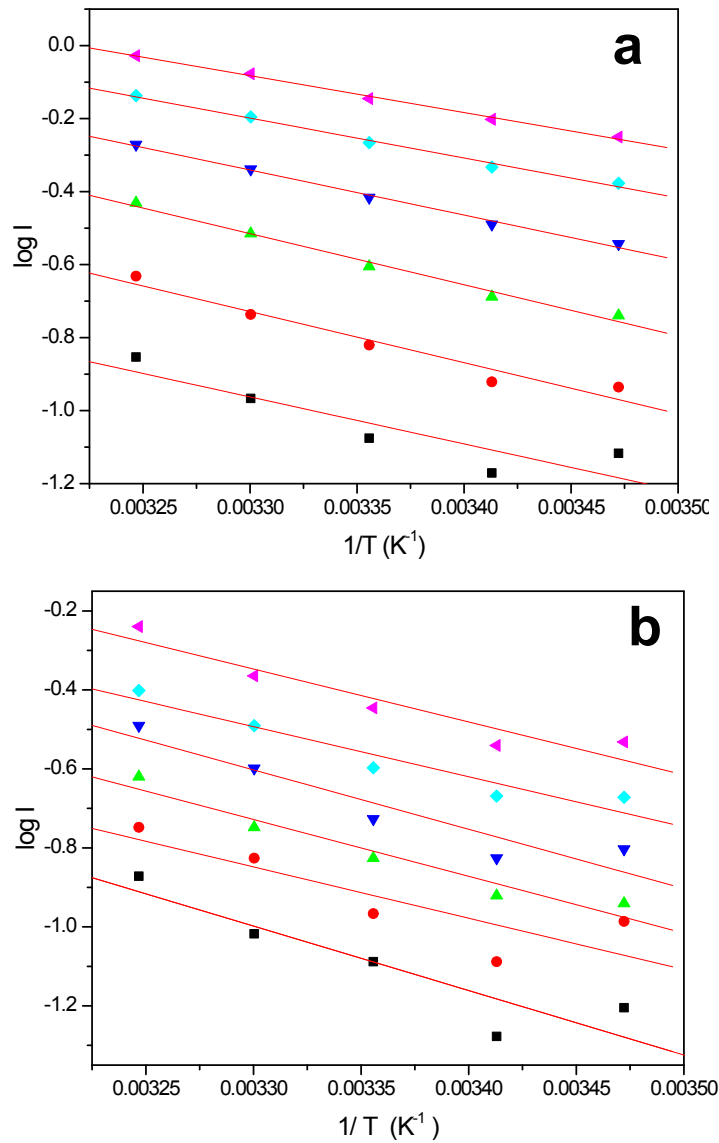

Fig.S4: Arrhenius plots for (a) Pd NP (b) Au NP modified graphite rod in 2M MeOH / 0.5M NaOH Vs Hg/HgO/1M NaOH at different potential ranges
